# Supplementary material
Source: ML conference proceedings conference paper supplement (https://proceedings.neurips.cc/paper_files/paper/2019/hash/34306d99c63613fad5b2a140398c0420-Abstract.html)
Supplement: Supplementary file [file 34306d99c63613fad5b2a140398c0420-Supplemental.zip]

---

# Supplementary Material:

## GIFT: Learning Transformation-Invariant Dense Visual Descriptors via Group CNNs

---

Yuan Liu   Zehong Shen   Zhixuan Lin   Sida Peng   Hujun Bao\*   Xiaowei Zhou\*  
State Key Lab of CAD&CG, ZJU-Sensetime Joint Lab of 3D Vision, Zhejiang University

### 1 Proof of Lemma 2 and Proposition 1

**Proof of Lemma 2.** The input group feature  $f_{l-1}$  has the equivariance defined in Lemma 1, which means that transforming the input image  $I$  with  $h' \in G$  results in a group feature  $f'$  satisfying  $f'_{l-1}(g) = f_{l-1}(gh')$ . Processing  $f'_{l-1}$  by a group convolution, the output group feature  $f'_l(g)$  is  $[f'_l(g)]_i = \sigma(\sum_{h \in H} f'_{l-1}(hg)W_i(h) + b_i) = \sigma(\sum_{h \in H} f_{l-1}(h(gh'))W_i(h) + b_i) = [f_l(gh')]_i$ .  $\square$

**Proof of Proposition 1.** Based on Lemma 1 and Lemma 2, both the outputs of two group CNNs  $f_{l,\alpha}$  and  $f_{l,\beta}$  are equivariant to the transformation of image, which means transforming the input image  $I$  with  $h' \in G$  results in group features  $f'_{l,\alpha}$  and  $f'_{l,\beta}$  which satisfy  $f'_{l,\alpha}(g) = f_{l,\alpha}(gh')$  and  $f'_{l,\beta}(g) = f_{l,\beta}(gh')$  respectively. The bilinear pooling of the  $f'_{l,\alpha}$  and  $f'_{l,\beta}$  is defined as  $d'_{i,j} = \int_G [f'_{l,\alpha}(g)]_i [f'_{l,\beta}(g)]_j dg = \int_G [f_{l,\alpha}(gh')]_i [f_{l,\beta}(gh')]_j dg$ . Then replacing  $gh'$  with  $g'$  results in  $d'_{i,j} = \int_G [f_{l,\alpha}(g')]_i [f_{l,\beta}(g')]_j dg' = d_{i,j}$ .  $\square$

### 2 Bilinear forms of methods [5, 3, 1]

**Subspace pooling [3, 1].** The local descriptors proposed in the [3, 1] are extracted by singular value decomposition, which is denoted as subspace pooling in [4]. The subspace pooling is proved to be a special form of bilinear pooling [2]. The proof is referred to [4] for the detail.

**Accumulated stability [5].** The accumulated stability (AS) can be defined by  $AS = \sum_{g \in G} \sum_{h \in G} |f(g) - f(h)|$  using the notation of our paper. The accumulated stability can be written as  $(\sum_h |f(g) - f(h)|) \cdot \mathbf{1}$ . It becomes a bilinear model when the output of the network  $\alpha$  is  $\sum_h |f(g) - f(h)| \in \mathbb{R}^{n_\alpha \times n_g}$  and the output of the network  $\beta$  is all ones  $\mathbf{1} \in \mathbb{R}^{n_g \times 1}$ .

### 3 Architecture

We list the architectures of the models used in our experiments in Table 1, 2, 3, 4, 5, 6 and 7. In these tables, "Conv(output channels, kernel size, stride)" denotes a convolutional layer. "Linear(output channels)" denotes a fully connected layer. "AvgPool(kernel size, stride)" and "MaxPool(kernel size, stride)" denote a average pooling layer and a max pooling layer respectively. "Subspace-Pool(dim)" denotes a subspace pooling [4] which retains the first "dim" eigenvectors.

---

\*Corresponding authors: {xzhou,bao}@cad.zju.edu.cn. Project page: <https://zju3dv.github.io/GIFT>.

| VCNN                                   |                                             |
|----------------------------------------|---------------------------------------------|
| layer                                  | operation                                   |
| conv0_sequential                       | Conv(32,5,1)-InstanceNorm-ReLU-AvgPool(2,2) |
| conv0_short                            | Conv(32,2,2)-InstanceNorm                   |
| conv0 = conv0_sequential + conv0_short |                                             |
| conv1_sequential                       | Conv(32,5,1)-InstanceNorm-ReLU-AvgPool(2,2) |
| conv1_short                            | Conv(32,2,2)-InstanceNorm                   |
| conv1 = conv1_sequential + conv1_short |                                             |
| conv2_sequential                       | Conv(64,5,1)-InstanceNorm-ReLU-AvgPool(2,2) |
| conv2_short                            | Conv(64,2,2)-InstanceNorm                   |
| conv2 = conv2_sequential + conv2_short |                                             |
| conv3                                  | Conv(32,5,1)-InstanceNorm-L2Norm            |

Table 1: Architecture of the Vanilla Convolutional Neural Network (VCNN).

| GFC                            |                                             |
|--------------------------------|---------------------------------------------|
| layer                          | operation                                   |
| Extractor                      | Conv(16,5,1)-InstanceNorm-ReLU-             |
|                                | Conv(32,5,1)-InstanceNorm-ReLU-AvgPool(2,2) |
|                                | Conv(32,5,1)-InstanceNorm-ReLU-             |
|                                | Conv(32,5,1)-InstanceNorm-L2Norm            |
| Extractor( $T_{g_i} \circ I$ ) |                                             |
| fully connected                | Linear(32*5*5, 512)-ReLU-Linear(512,128)    |

Table 2: Architecture of Group Fully Connected Networks (GFC).

| GAS                              |                                             |
|----------------------------------|---------------------------------------------|
| layer                            | operation                                   |
| Extractor                        | Conv(16,5,1)-InstanceNorm-ReLU-             |
|                                  | Conv(32,5,1)-InstanceNorm-ReLU-AvgPool(2,2) |
|                                  | Conv(32,5,1)-InstanceNorm-ReLU-             |
|                                  | Conv(32,5,1)-InstanceNorm-L2Norm            |
| Extractor( $T_g \circ I$ )       |                                             |
| feature_network                  | Conv(64,1,1)-ReLU-Conv(128,1,1)             |
| attention_network                | Linear(800,512)-ReLU-Linear(512,25)-SoftMax |
| Sum(attention $\times$ features) |                                             |

Table 3: Architecture of Group Attention Selection Networks (GAS).

| GIFT                                  |                                             |
|---------------------------------------|---------------------------------------------|
| layer                                 | operation                                   |
| Extractor                             | Conv(16,5,1)-InstanceNorm-ReLU-             |
|                                       | Conv(32,5,1)-InstanceNorm-ReLU-AvgPool(2,2) |
|                                       | Conv(32,5,1)-InstanceNorm-ReLU-             |
|                                       | Conv(32,5,1)-InstanceNorm-L2Norm            |
| Extractor( $T_g \circ I$ )            |                                             |
| group_conv1                           | Conv(8,3,1)                                 |
| group_conv2                           | Conv(16,3,1)                                |
| BilinearPool(group_conv1,group_conv2) |                                             |

Table 4: Architecture of the proposed method GIFT-1.

| Max Pooling                |                                             |
|----------------------------|---------------------------------------------|
| layer                      | operation                                   |
| Extractor                  | Conv(16,5,1)-InstanceNorm-ReLU-             |
|                            | Conv(32,5,1)-InstanceNorm-ReLU-AvgPool(2,2) |
|                            | Conv(32,5,1)-InstanceNorm-ReLU-             |
|                            | Conv(32,5,1)-InstanceNorm-L2Norm            |
| Extractor( $T_g \circ I$ ) |                                             |
| group_conv                 | Conv(128,3,1)-MaxPool(5,5)                  |

Table 5: Architecture of the model using max pooling.

| Average Pooling            |                                             |
|----------------------------|---------------------------------------------|
| layer                      | operation                                   |
| Extractor                  | Conv(16,5,1)-InstanceNorm-ReLU-             |
|                            | Conv(32,5,1)-InstanceNorm-ReLU-AvgPool(2,2) |
|                            | Conv(32,5,1)-InstanceNorm-ReLU-             |
|                            | Conv(32,5,1)-InstanceNorm-L2Norm            |
| Extractor( $T_g \circ I$ ) |                                             |
| group_conv                 | Conv(128,3,1)-AvgPool(5,5)                  |

Table 6: Architecture of the model using average pooling.

| Subspace Pooling           |                                             |
|----------------------------|---------------------------------------------|
| layer                      | operation                                   |
| Extractor                  | Conv(16,5,1)-InstanceNorm-ReLU-             |
|                            | Conv(32,5,1)-InstanceNorm-ReLU-AvgPool(2,2) |
|                            | Conv(32,5,1)-InstanceNorm-ReLU-             |
|                            | Conv(32,5,1)-InstanceNorm-L2Norm            |
| Extractor( $T_g \circ I$ ) |                                             |
| SubspacePool [4]           | Conv(16,3,1)-SubspacePool(8)                |

Table 7: Architecture of the model using subspace pooling

## References

- [1] Tal Hassner, Viki Mayzels, and Lihi Zelnik-Manor. On sifts and their scales. In *2012 IEEE Conference on Computer Vision and Pattern Recognition*, pages 1522–1528. IEEE, 2012.
- [2] Tsung-Yu Lin, Aruni RoyChowdhury, and Subhransu Maji. Bilinear cnn models for fine-grained visual recognition. In *Proceedings of the IEEE international conference on computer vision*, pages 1449–1457, 2015.
- [3] Zhenhua Wang, Bin Fan, and Fuchao Wu. Affine subspace representation for feature description. In *European Conference on Computer Vision*, pages 94–108. Springer, 2014.
- [4] Xing Wei, Yue Zhang, Yihong Gong, and Nanning Zheng. Kernelized subspace pooling for deep local descriptors. In *Proceedings of the IEEE Conference on Computer Vision and Pattern Recognition*, pages 1867–1875, 2018.
- [5] Tsun-Yi Yang, Yen-Yu Lin, and Yung-Yu Chuang. Accumulated stability voting: A robust descriptor from descriptors of multiple scales. In *Proceedings of the IEEE Conference on Computer Vision and Pattern Recognition*, pages 327–335, 2016.
